# Supplementary material
Source: publisher site journal article supplement (https://www.dovepress.com/article/205842)
Supplement: Supplementary file 1 [file get_supplementary_file.php]

**Supplemental Table 1.** Overview of 55 initial marketing authorizations available on April 1, 2018 - EMA clinical data website for timeline assessment by WHO ATC category (as categorized by the EMA on their ECDW).

| INN (Active Substance Name)              | Indication WHO ATC code | Type of initial marketing authorization | Timeline modelling possible <sup>1</sup> | CDP timeframe CSR or CO | Study ongoing at the time of submission <sup>3</sup> | Healthy volunteer studies in CDP | Pediatric patient / studies in CDP | Documents on ECDW | No. of studies in CDP | Number of phase I studies |
|------------------------------------------|-------------------------|-----------------------------------------|------------------------------------------|-------------------------|------------------------------------------------------|----------------------------------|------------------------------------|-------------------|-----------------------|---------------------------|
| Palonosetron                             | A04AA05                 | 2 Generic CDPs                          | No                                       | No CSR                  | N/A                                                  | N/A                              | N/A                                | 2 + 2             | 0                     | 0                         |
| Chenodeoxycholic acid                    | A05AA01                 | Orphan (Retrospective studies)          | No                                       | Redacted                | Yes                                                  | No                               | Yes                                | 14                | 2                     | 0                         |
| Eluxadolone                              | A07                     | Other                                   | Yes <sup>b,c</sup>                       | 2007 - 2015             | Yes                                                  | Yes                              | No                                 | 101               | 14                    | 11                        |
| Pancreas powder (Withdrawn)              | A09AA02                 | Other                                   | Yes <sup>a,b</sup>                       | 2005 - 2014             | No                                                   | No                               | Yes                                | 35                | 7                     | 1                         |
| Empagliflozin + linagliptin <sup>2</sup> | A10BD19                 | Other                                   | Yes <sup>d</sup>                         | 2010 - 2016             | No                                                   | Yes                              | No                                 | 36                | 13                    | 6                         |
| Saxagliptin + dapagliflozin              | A10BD21                 | Other                                   | Yes                                      | 2010 - 2015             | Yes                                                  | Yes                              | No                                 | 22                | 6                     | 3                         |
| Migalastat                               | A16AX14                 | Orphan                                  | No                                       | No CSR                  | N/A                                                  | N/A                              | N/A                                | 0                 | N/A                   | N/A                       |
| Enoxaparin                               | B01AB05                 | 2 Generic CDPs (both with same CSR)     | No                                       | Redacted                | No                                                   | Yes                              | No                                 | 4 + 4             | 1                     | 1                         |
| Albutrepenonacog alfa                    | B02BD                   | Orphan                                  | Yes                                      | 2010 - 2015             | Yes                                                  | No                               | Yes                                | 45                | 5                     | 1                         |
| Eftrenonacog alfa                        | B02BD04                 | Orphan                                  | Yes                                      | 2008 - 2014             | No                                                   | No                               | Yes                                | 16                | 4                     | 1                         |
| Human coagulation factor X               | B02BD13                 | Orphan                                  | No                                       | 2010 - 2013             | No                                                   | No                               | Yes                                | 7                 | 2                     | 0                         |
| Amlopipine + valsartan                   | C09DB01                 | Generic                                 | No                                       | 2013                    | No                                                   | Yes                              | No                                 | 11                | 2                     | 2                         |
| Chlorhexidine                            | D08AC02                 | Other (Article 58)                      | No <sup>a</sup>                          | 2002 - 2012             | No                                                   | Yes                              | Yes                                | 6                 | 0 (4 <sup>4</sup> )   | 0                         |
| Sildenafil                               | G04BE03                 | Generic                                 | No                                       | 2009                    | No                                                   | Yes                              | No                                 | 7                 | 1                     | 1                         |
| Ceftazidime + avibactam                  | J01DD52                 | Other                                   | Yes <sup>a</sup>                         | 2006 - 2015             | No                                                   | Yes                              | No                                 | 98                | 26                    | 18                        |
| Ertapenem                                | J01DH03                 | Generic                                 | No                                       | No CSR                  | N/A                                                  | N/A                              | N/A                                | 2                 | 0                     | 0                         |
| Caspofungin acetate                      | J02AX04                 | Generic                                 | No                                       | No CSR                  | N/A                                                  | N/A                              | N/A                                | 2                 | 0                     | 0                         |
| Elbasvir + grazoprevir                   | J05A                    | Other                                   | Yes <sup>b,c</sup>                       | 2009 - 2015             | Yes                                                  | Yes                              | No                                 | 512               | 73                    | 59                        |
| Tenofovir disoproxil                     | J05AF07                 | Other                                   | No                                       | Redacted                | No                                                   | Yes                              | No                                 | 4                 | 1                     | 1                         |

| INN (Active Substance Name)                                                  | Indication WHO ATC code | Type of initial marketing authorization | Timeline modelling possible <sup>1</sup> | CDP timeframe CSR or CO  | Study ongoing at the time of submission <sup>3</sup> | Healthy volunteer studies in CDP | Pediatric patient / studies in CDP | Documents on ECDW | No. of studies in CDP | Number of phase I studies |
|------------------------------------------------------------------------------|-------------------------|-----------------------------------------|------------------------------------------|--------------------------|------------------------------------------------------|----------------------------------|------------------------------------|-------------------|-----------------------|---------------------------|
| Emtricitabine + tenofovir disoproxil                                         | J05AR03                 | 2 Generic CDPs - both with same CSR     | No                                       | Redacted                 | No                                                   | Yes                              | No                                 | 4 + 4             | 1                     | 1                         |
| Emtricitabine + Tenofovir Alafenamide                                        | J05AR17                 | Other                                   | Yes <sup>c</sup>                         | 1993 - 2016              | No                                                   | Yes                              | Yes                                | 324               | 54                    | 39                        |
| Emtricitabine + rilpivirine + tenofovir alafenamide                          | J05AR19                 | Other                                   | Yes <sup>a,b,c</sup>                     | 1993 - 2016              | Yes                                                  | Yes                              | Yes                                | 918               | 76                    | 52                        |
| Sofosbuvir + velpatasvir                                                     | J05AX69                 | Other                                   | Yes <sup>b,c</sup>                       | 2009 - 2015              | Yes                                                  | Yes                              | No                                 | 455               | 50                    | 30                        |
| Pandemic influenza vaccine H5N1                                              | J07BB03                 | Other                                   | No                                       | 2004 <sup>5</sup> - 2014 | Yes                                                  | Yes                              | Yes                                | 112               | 81                    | 12                        |
| Pemetrexed                                                                   | L01BA04                 | 2 CDPs (1 Generic, 1 Other)             | No                                       | No CSR                   | N/A                                                  | N/A                              | N/A                                | 19                | 0                     | 0                         |
| Trifluridine + tipiracil                                                     | L01BC                   | Other                                   | Yes <sup>b,c</sup>                       | 1998 - 2015              | Yes                                                  | No                               | No                                 | 66                | 15                    | 12                        |
| Docetaxel (withdrawn)                                                        | L01CD02                 | Generic                                 | No                                       | No CSR                   | N/A                                                  | N/A                              | N/A                                | 2                 | 0                     | 0                         |
| Daratumumab                                                                  | L01XC                   | Orphan                                  | No <sup>a</sup>                          | 2007 - 2015              | Yes                                                  | No                               | No                                 | 28                | 5                     | 2                         |
| Elotuzumab                                                                   | L01XC23                 | Other                                   | Yes                                      | 2006 - 2015              | Yes                                                  | No                               | No                                 | 20                | 9                     | 3                         |
| Rociletinib (withdrawn)                                                      | L01XE                   | Other                                   | No <sup>a</sup>                          | 2011 - 2015              | Yes                                                  | Yes                              | No                                 | 36                | 7                     | 5                         |
| Osimertinib                                                                  | L01XE                   | Other                                   | No                                       | 2012 - 2015              | Yes                                                  | No                               | No                                 | 104               | 11                    | 9                         |
| Lenvatinib                                                                   | L01XE29                 | Other                                   | Yes <sup>c</sup>                         | 2005 - 2015              | Yes                                                  | Yes                              | No                                 | 205               | 25                    | 15                        |
| Bortezomib                                                                   | L01XX32                 | 2 Generic CDPs                          | No                                       | No CSR                   | N/A                                                  | N/A                              | N/A                                | 2 + 2             | 0                     | 0                         |
| Carfilzomib                                                                  | L01XX45                 | Orphan                                  | Yes                                      | 2005- 2015               | Yes                                                  | No                               | No                                 | 115               | 13                    | 4                         |
| Autologous CD34+ enriched cell fraction that contains CD34+ cells transduced | L03                     | Orphan                                  | No                                       | 2000 - 2014              | Yes                                                  | No                               | Yes                                | 23                | 5                     | 4                         |
| Ixekizumab                                                                   | L04                     | Other                                   | Yes                                      | 2006 - 2016              | Yes                                                  | No                               | No                                 | 72                | 13                    | 6                         |
| Begelomab (withdrawn)                                                        | L04AA35                 | Orphan                                  | No                                       | Redacted                 | Yes <sup>8</sup>                                     | No                               | No                                 | 11                | 2                     | 1                         |
| Infliximab                                                                   | L04AB02                 | Biosimilar                              | Yes                                      | 2012 - 2015              | Yes                                                  | Yes                              | No                                 | 15                | 2                     | 1                         |
| Daclizumab                                                                   | L04AC01                 | Other                                   | Yes <sup>b,c</sup>                       | 2004 - 2015              | Yes                                                  | Yes                              | No                                 | 20                | 11                    | 4                         |

| INN (Active Substance Name)                  | Indication WHO ATC code | Type of initial marketing authorization | Timeline modelling possible <sup>1</sup> | CDP timeframe CSR or CO | Study ongoing at the time of submission <sup>3</sup> | Healthy volunteer studies in CDP | Pediatric patient / studies in CDP | Documents on ECDW | No. of studies in CDP | Number of phase I studies |
|----------------------------------------------|-------------------------|-----------------------------------------|------------------------------------------|-------------------------|------------------------------------------------------|----------------------------------|------------------------------------|-------------------|-----------------------|---------------------------|
| Methotrexate                                 | L04AX03                 | Other                                   | No                                       | No CSR                  | N/A                                                  | N/A                              | N/A                                | 2                 | 0                     | 0                         |
| Lesinurad                                    | M04AB05                 | Other                                   | Yes                                      | 2008 - 2014             | Yes                                                  | Yes                              | No                                 | 246               | 45                    | 30                        |
| Alendronic acid + colecalciferol (withdrawn) | M05BB03                 | Generic                                 | No                                       | Redacted                | No                                                   | Yes                              | No                                 | 8                 | 1                     | 1                         |
| Drisapersen (withdrawn)                      | M09AX04                 | Orphan                                  | No                                       | 2009 - 2014             | Yes                                                  | No                               | Yes                                | 105               | 9                     | 1                         |
| Zonisamide                                   | N03AX15                 | Generic                                 | No                                       | Redacted                | No                                                   | Yes                              | No                                 | 4                 | 1                     | 1                         |
| Rasagiline                                   | N04DB02                 | Generic                                 | No                                       | 2009                    | No                                                   | Yes                              | No                                 | 7                 | 1                     | 1                         |
| Aripiprazole                                 | N05AX12                 | Generic                                 | No                                       | 2013                    | No                                                   | Yes                              | No                                 | 12                | 2                     | 2                         |
| Salmeterol + fluticasone propionate          | R03AK06                 | 2 CDPs - both with same CSRs            | No <sup>a</sup>                          | 2008 - 2014             | No                                                   | Yes                              | No                                 | 10 + 10           | 4                     | 4                         |
| Idarucizumab                                 | V03AB37                 | Other                                   | No <sup>a</sup>                          | 2012 - 2015             | No                                                   | Yes                              | No                                 | 25                | 4                     | 1                         |
| Lutetium chloride                            | V10X                    | Other                                   | No                                       | No CSR                  | N/A                                                  | N/A                              | N/A                                | 2                 | 0                     | 0                         |

**Notes:** 1. <sup>a</sup> Excluded from core CDP set because the CDP did not cover all 3 phases of clinical development, eg the idarucizumab CDP had no phase II CSRs.

Saxagliptin + dapagliflozin scored “No” as earliest CSR documents were phase III; “No” also scored if dates redacted. CDPs were scored as “Yes” if clinical study reports had all FSI and LSO dates for all CSRs. “Yes” was also scored if interim reports for a study were available. There are additional lifecycle aspects that could not be fully integrated, eg if the corresponding EPAR indicated that: literature was used to support the market authorization (note: literature is not made available on the EMA clinical website). Additional exclusions because <sup>b</sup> Post-marketing, eg pharmacovigilance activities, ongoing, <sup>c</sup> Interventional studies planned or ongoing or, <sup>d</sup> studies in monotherapy CDP not included in fixed dose combination development was scored “No”.

2. Clinical study reports from 2004 available on the ECDW but the clinical development was initiated 2010 according to CO.

3. The MAH/sponsor has submitted interim reports in M.5. The EPAR or the clinical overview indicated that there were ongoing clinical studies or studies planned at the time of submission.

4. Four clinical studies - literature references – are cited in the chlorhexidine submission. As no clinical study report documents were available the score was 0.

5. Available documents for pandemic influenza vaccine H5N1 date back to 1995; however, the clinical development for the specific indication and population started in 2004.

**Abbreviations:** ATC=anatomical therapeutic chemical classification system, CDP=clinical development pathway; CO=clinical overview; CSR=clinical study report; ECDW= EMA clinical data website; EMA=European Medicines Agency; EPAR=European Public Assessment Report; FSI=first-subject-in; INN=international non-proprietary name, LSO=last-subject-out; N/A=not available, WHO=world health organization.
